# Supplementary material for: Unexpected 1D self-assembly of carbonate-templated sandwich-like macrocycle-based Ag20S10luminescent nanoclusters
Source: Royal Society of Chemistry journal article supplement (doi:10.1039/c4ce00867g), 2014-06-12
Supplement: c4ce00867g1.pdf [file c4ce00867g1.pdf]

## Supporting Information

5

### Unexpected 1D self-assembly of carbonate-templated sandwich-like macrocycle-based Ag<sub>20</sub>S<sub>10</sub> luminescent nanoclusters

10

Kun Zhou, Chao Qin, Xin-Long Wang,\* Kui-Zhan Shao, Li-Kai Yan and Zhong-Min Su\*

15

*Institute of Functional Material Chemistry, Key Lab of Polyoxometalate Science of Ministry of Education, Faculty of Chemistry, Northeast Normal University, Changchun, 130024, Jilin, China. Fax: (+86) 431-85684009; Tel: (+86) 431-85099108; E-mail: [zmsu@nenu.edu.cn](mailto:zmsu@nenu.edu.cn).*

20

### Table of contents

25

|    |                                                  |       |
|----|--------------------------------------------------|-------|
| 30 | 1. Synthetic procedures .....                    | S2    |
|    | 2. Crystallographic studies.....                 | S2    |
|    | 3. Selected bond lengths (Å) for compound 1..... | S2-S3 |
|    | 4. Physical Measurements .....                   | S3-S8 |

35

## 1. Synthetic procedures

**General comments:** AgS'Bu was prepared by using Et<sub>3</sub>N as organic solvent and reacted with equivalent amounts of AgNO<sub>3</sub> with HS'Bu according to the literature.<sup>1</sup> In addition, (NH<sub>4</sub>)<sub>3</sub>[CrMo<sub>6</sub>O<sub>24</sub>H<sub>6</sub>] $\cdot$ 7H<sub>2</sub>O were synthesized according to the literature.<sup>2</sup> Other reagents and solvents for synthesis were obtained from 5 commercial sources and used without further purification.

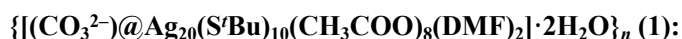

Compound **1** was obtained by one-pot synthesis, namely, AgS'Bu (0.0644 g, 0.3268 mmol) with (NH<sub>4</sub>)<sub>3</sub>[CrMo<sub>6</sub>O<sub>24</sub>H<sub>6</sub>] $\cdot$ 7H<sub>2</sub>O (0.0126 g, 0.0105 mmol), Ni(CH<sub>3</sub>COO)<sub>2</sub> $\cdot$ 4H<sub>2</sub>O (0.0306 g, 0.1230 mmol), 10 AgCF<sub>3</sub>COO (0.0180 g, 0.0815 mmol) and AgBF<sub>4</sub> (0.0123 g, 0.0632 mmol) were dissolved in ethanol–acetonitrile–dimethylformamide(DMF) (v : v : v=1 : 1 : 1) (15 mL) under stir at room temperature to gain a gray-violet suspension (pH  $\approx$  7.5). Then the gray-violet suspension was uninterruptedly stirred at room temperature for 2d and then was filtered. The filtrate was evaporated slowly in air at room temperature. Compound **1** was deposited as lightyellow polyhedron crystals. Compound **1** can also be obtained by using the 15 same method just without [CrMo<sub>6</sub>O<sub>24</sub>H<sub>6</sub>]<sup>3-</sup> polyoxoanion. Yield: ca. 63% (based on Ag). Elemental analysis (%) calcd for C<sub>63</sub>H<sub>132</sub>O<sub>23</sub>N<sub>2</sub>S<sub>10</sub>Ag<sub>20</sub>: C, 20.10; H, 3.54; N, 0.74; S, 8.52; Ag, 57.32. Found: C, 20.04; H, 3.51; N, 0.75; S, 8.48; Ag, 57.24.

## 2. Crystallographic studies

Single-crystal X-ray diffraction data for **1** was recorded on a Bruker Apex CCD II area-detector diffractometer 20 with graphite-monochromated Mo-K $\alpha$  radiation ( $\lambda$  = 0.71069 Å) at 298(2) K. Absorption corrections were applied using multi-scan technique and performed by using the SADABS program. The structure of compound **1** was solved by direct methods and refined on  $F^2$  by full-matrix least squares methods using the SHELXTL package.<sup>3</sup>

25 Crystal data for **1**: C<sub>63</sub>H<sub>132</sub>O<sub>23</sub>N<sub>2</sub>S<sub>10</sub>Ag<sub>20</sub>;  $P$ -1;  $a$  = 12.947(5) Å,  $b$  = 15.169(5) Å,  $c$  = 15.922(5) Å;  $\alpha$  = 67.605(5) °;  $\beta$  = 82.355(5) °;  $\gamma$  = 65.089(5) °;  $V$  = 2620.7(16) Å<sup>3</sup>;  $Z$  = 1; 15130 reflns measured, 9186 unique ( $R_{\text{int}}$  = 0.0506); final  $R_I$  = 0.0614,  $wR_2$  = 0.1519 for 5443 observed reflections [ $I > 2\sigma(I)$ ]. CCDC-998570 (**1**) contains the supplementary crystallographic data for this paper. These data can be obtained free of charge from the Cambridge Crystallographic Data Centre via [www.ccdc.cam.ac.uk/ data\\_request/cif](http://www.ccdc.cam.ac.uk/data_request/cif) for **1**.

## 30 3. Selected bond lengths (Å) for compound **1**

**Table S1.** Selected bond lengths (Å) for compound **1**

|    |                           |           |             |            |
|----|---------------------------|-----------|-------------|------------|
|    | Ag(1)-O(10) <sup>#1</sup> | 2.38(2)   | Ag(1)-S(5)  | 2.619(4)   |
|    | Ag(1)-O(7)                | 2.452(11) | Ag(1)-Ag(6) | 2.9614(18) |
|    | Ag(1)-S(1)                | 2.489(4)  | Ag(1)-Ag(5) | 3.0343(19) |
| 35 | Ag(1)-O(9)                | 2.52(2)   | Ag(2)-S(1)  | 2.458(3)   |

|    |                            |            |    |                            |            |
|----|----------------------------|------------|----|----------------------------|------------|
|    | Ag(2)-S(2)                 | 2.472(3)   |    | Ag(7)-O(3)                 | 2.335(12)  |
|    | Ag(2)-O(11)                | 2.547(16)  | 30 | Ag(7)-O(2)                 | 2.442(11)  |
|    | Ag(2)-Ag(9)                | 2.9767(19) |    | Ag(7)-S(1)                 | 2.584(3)   |
| 5  | Ag(2)-Ag(8)                | 3.0748(17) |    | Ag(7)-S(3)                 | 2.594(4)   |
|    | Ag(2)-Ag(3)                | 3.3213(17) |    | Ag(7)-Ag(8)                | 3.0041(18) |
|    | Ag(3)-S(3) <sup>#1</sup>   | 2.437(4)   |    | Ag(8)-O(4)                 | 2.285(11)  |
|    | Ag(3)-S(2)                 | 2.439(4)   | 35 | Ag(8)-S(1)                 | 2.536(4)   |
|    | Ag(3)-O(9) <sup>#1</sup>   | 2.526(19)  |    | Ag(8)-O(12)                | 2.543(10)  |
| 10 | Ag(3)-Ag(6) <sup>#1</sup>  | 3.1581(18) |    | Ag(8)-S(4)                 | 2.613(3)   |
|    | Ag(3)-Ag(4) <sup>#1</sup>  | 3.243(2)   |    | Ag(8)-Ag(9)                | 3.2172(16) |
|    | Ag(4)-O(11)                | 2.26(2)    |    | Ag(9)-O(5)                 | 2.266(11)  |
|    | Ag(4)-S(3)                 | 2.423(4)   | 40 | Ag(9)-S(2)                 | 2.565(4)   |
|    | Ag(4)-S(4)                 | 2.434(4)   |    | Ag(9)-S(4)                 | 2.586(3)   |
| 15 | Ag(4)-O(10) <sup>#1</sup>  | 2.54(2)    |    | Ag(9)-Ag(10)               | 2.9251(14) |
|    | Ag(4)-Ag(8)                | 2.9782(19) |    | Ag(9)-Ag(5) <sup>#1</sup>  | 3.0100(18) |
|    | Ag(4)-Ag(3) <sup>#1</sup>  | 3.243(2)   |    | Ag(10)-O(6)                | 2.297(9)   |
|    | Ag(4)-Ag(7)                | 3.2675(18) | 45 | Ag(10)-O(6) <sup>#2</sup>  | 2.450(8)   |
|    | Ag(5)-S(4) <sup>#1</sup>   | 2.447(3)   |    | Ag(10)-S(5) <sup>#1</sup>  | 2.596(4)   |
| 20 | Ag(5)-S(5)                 | 2.464(3)   |    | Ag(10)-S(2)                | 2.640(3)   |
|    | Ag(5)-O(11) <sup>#1</sup>  | 2.476(17)  |    | Ag(10)-Ag(5) <sup>#1</sup> | 3.2776(19) |
|    | Ag(5)-O(9)                 | 2.56(2)    |    | O(6)-Ag(10) <sup>#2</sup>  | 2.450(8)   |
|    | Ag(5)-Ag(9) <sup>#1</sup>  | 3.0100(17) | 50 | O(9)-Ag(3) <sup>#1</sup>   | 2.526(19)  |
|    | Ag(5)-Ag(10) <sup>#1</sup> | 3.2776(19) |    | O(10)-Ag(1) <sup>#1</sup>  | 2.38(2)    |
| 25 | Ag(6)-O(1)                 | 2.253(10)  |    | O(10)-Ag(4) <sup>#1</sup>  | 2.54(2)    |
|    | Ag(6)-S(5)                 | 2.473(4)   |    | O(11)-Ag(5) <sup>#1</sup>  | 2.476(17)  |
|    | Ag(6)-S(3)                 | 2.504(4)   |    | S(3)-Ag(3) <sup>#1</sup>   | 2.437(4)   |
|    | Ag(6)-Ag(7)                | 3.0108(19) | 55 | S(4)-Ag(5) <sup>#1</sup>   | 2.447(3)   |
|    | Ag(6)-Ag(3) <sup>#1</sup>  | 3.1581(18) |    | S(5)-Ag(10) <sup>#1</sup>  | 2.596(4)   |

Symmetry transformations used to generate equivalent atoms: #1 -x,-y+1,-z+2; #2 -x+1,-y,-z+2.

#### 4. Physical Measurements

Elemental analyses (C, H, N and S) were performed on an Elementar Vario EL III elemental analyzer. Ag was analyzed on a PLASMA-SPEC(I) ICP atomic emission spectrometer. The FT-IR spectrum was recorded from KBr pellets in the range of 4000–400 cm<sup>-1</sup> on a Mattson Alpha-Centauri spectrometer. XPS analysis was performed on a thermo ECSALAB 250 spectrometer with an Al K $\alpha$  (1486.6 eV) achromatic X-ray source running at 15 kV. The XPS binding energy (BE) was internally referenced to the aliphatic C(1s) peak (BE, 284.6 eV). PXRD patterns were recorded on a Siemens D 5005 diffractometer with Cu-K $\alpha$  ( $\lambda$ = 1.5418 Å) radiation in the range of 3-50 °C. TGA was performed on a Perkin-Elmer TGA analyzer heated from room temperature to 1000 °C under nitrogen gas with a heating rate of 10 °C/min. NMR data were recorded on a Bruker AV spectrometer (500 MHz). Mass spectra were carried out on a Bruker Daltonics flex Analysis instrument. TEM was performed on a JEOL-2100F transmission electron microscope under 200 kV accelerating voltage. Diffuse reflectivity was measured from 200 to 800 nm using barium sulfate (BaSO<sub>4</sub>) as a standard with 100% reflectance on a Varian Cary 500 UV-Vis spectrophotometer. Luminescence was measured on an F-4500 FL Spectrophotometer. A CHI 440 Electrochemical Quartz Crystal Microbalance was used for the electrochemical experiments. A conventional three-electrode cell was used at room temperature. The compounds bulk-modified carbon-paste electrodes (CPEs) were used as the working electrode. An SCE and a platinum wire were used as reference and auxiliary electrodes, respectively.

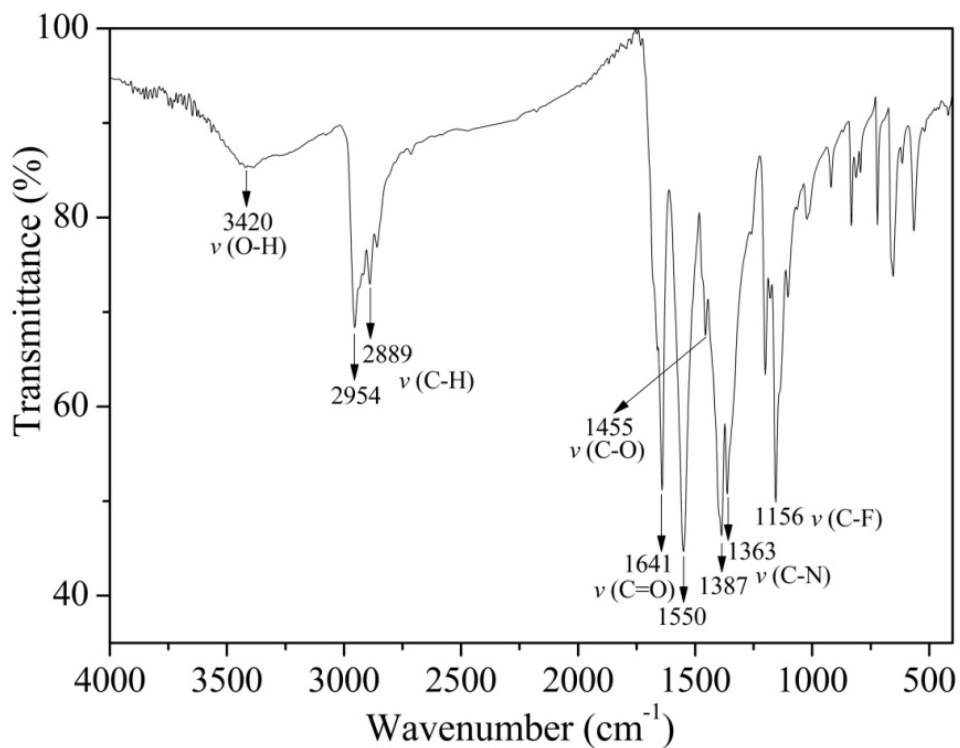

Fig. S1 IR spectrum of 1.

5

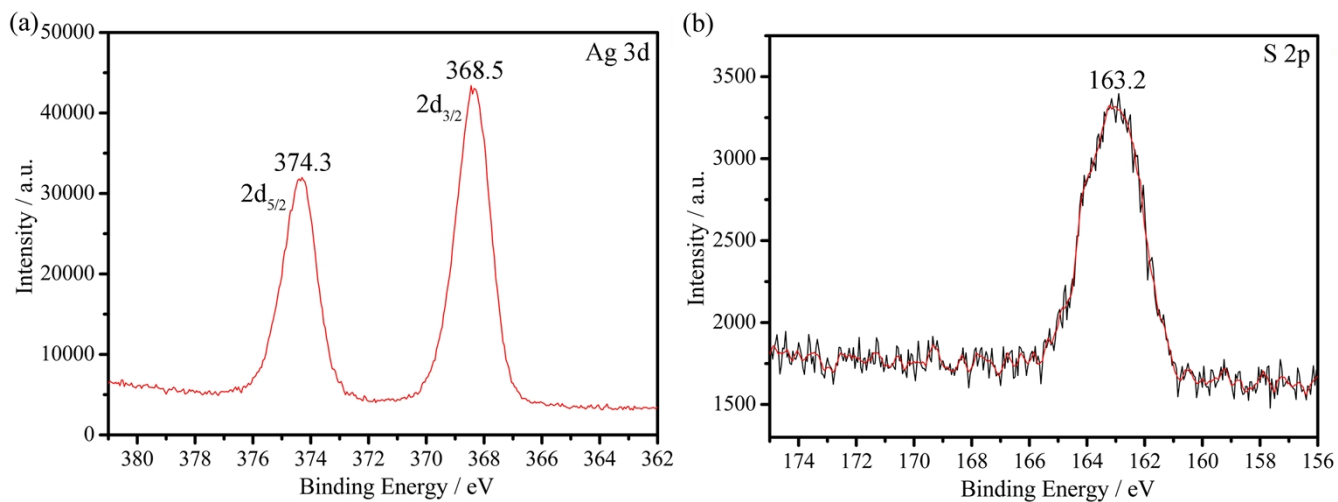

Fig. S2 XPS analysis of Ag (a) and S (b) for 1.

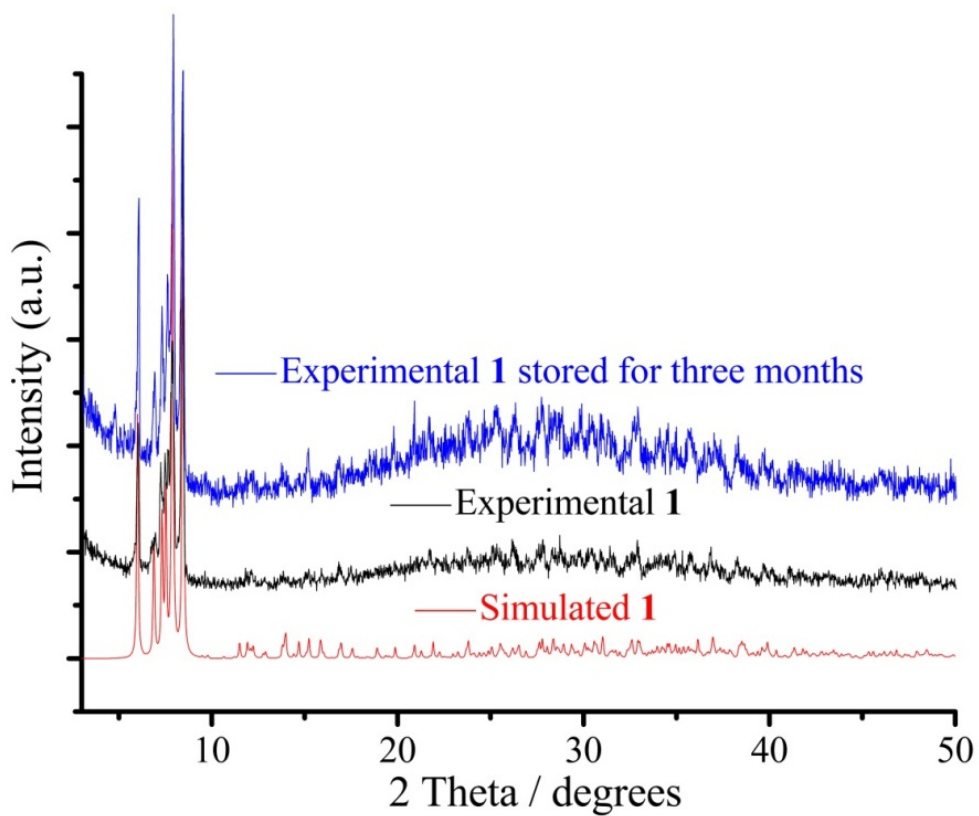

Fig. S3 Experimental and simulated X-ray powder diffraction patterns of 1.

5

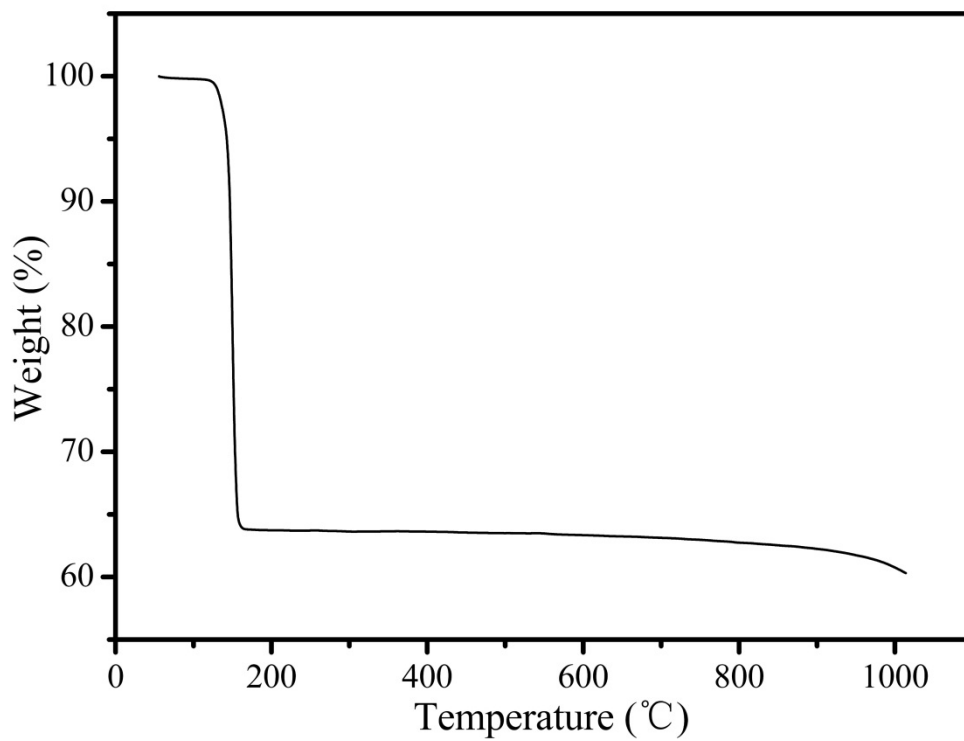

Fig. S4 TG curve of 1.

STANDARD PROTON PARAMETERS

Archive directory: /export/home/ouyy/vnmrsys/data  
 Sample directory:  
 Pulse Sequence: s2pul  
 Solvent: CDCl3  
 Ambient temperature  
 File: d2645  
 INOVA-500 "NENU500"

Relax. delay 1.000 sec  
 Pulse 45.0 degrees  
 Acq. time 1.892 sec  
 Width 10311.9 Hz  
 8 repetitions  
 OBSERVE H1, 499.8025893 MHz  
 DATA PROCESSING  
 FT size 65536  
 Total time 0 min, 23 sec

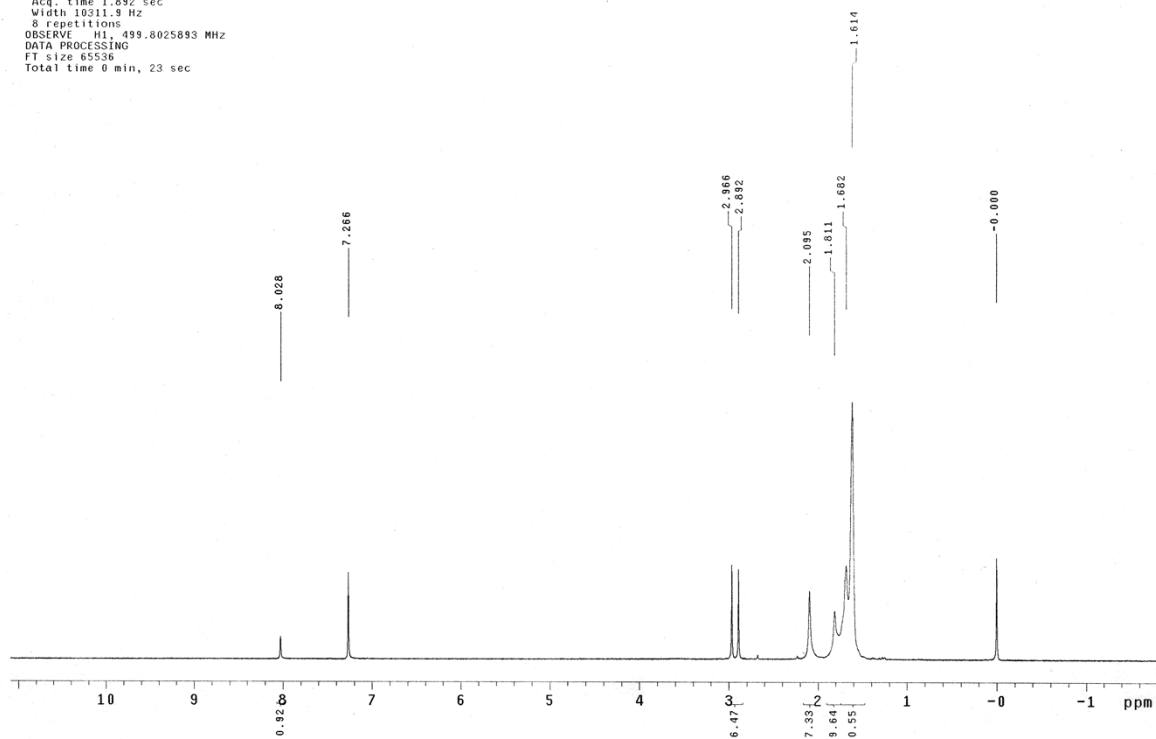

Fig. S5  $^1\text{H}$  NMR spectrum of **1** (500MHz,  $\text{CDCl}_3$ , RT).

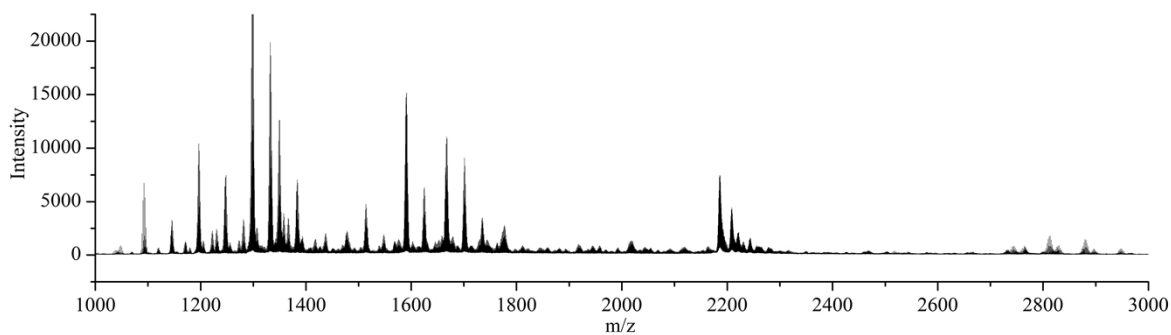

Fig. S6 (a) ESI mass spectrum of nanoparticles in **1**.

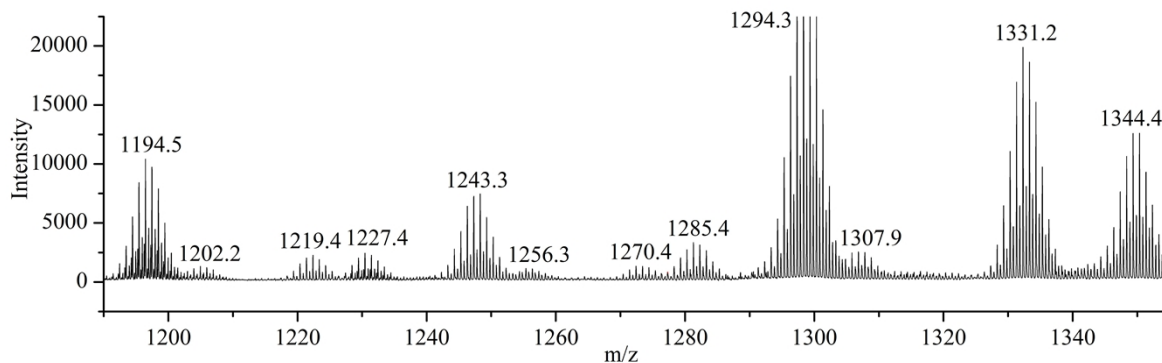

Fig. S6 (b) Zoomed-in spectrum of the 3+ ion sets.

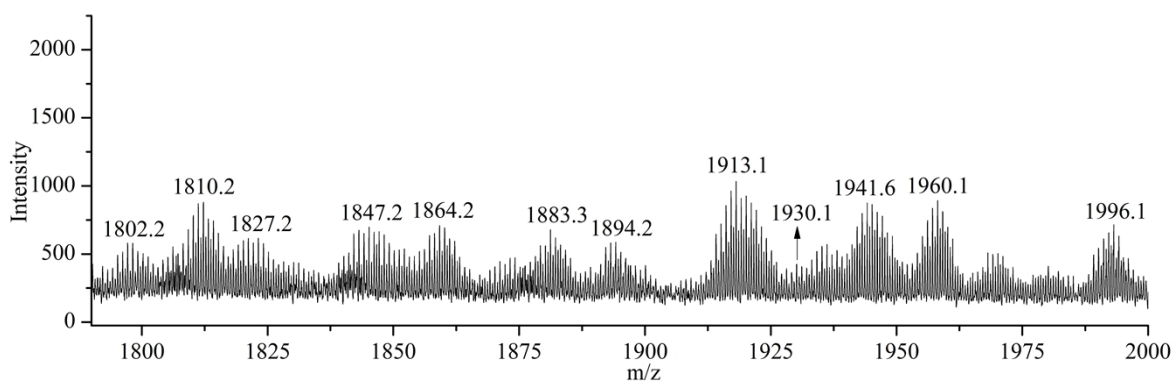

Fig. S6 (c) Zoomed-in spectrum of the 2+ ion sets.

Table S2. Detailed assignment of mass spectral data for nanoparticles in compound 1

| m/z observed | ion set                                                                                                                             | mass calculated | m/z calculated |
|--------------|-------------------------------------------------------------------------------------------------------------------------------------|-----------------|----------------|
| 1194.5       | $[(\text{CO}_3^{2-})@Ag_{20}(\text{S}'\text{Bu})_{10}(\text{CH}_3\text{COO})_8\text{H}_3]^{3+}$                                     | 3584.5          | 1194.8         |
| 1202.4       | $[(\text{CO}_3^{2-})@Ag_{20}(\text{S}'\text{Bu})_{10}(\text{CH}_3\text{COO})_8\text{H}_2\text{Na}_1]^{3+}$                          | 3606.5          | 1202.2         |
| 1219.4       | $[(\text{CO}_3^{2-})@Ag_{20}(\text{S}'\text{Bu})_{10}(\text{CH}_3\text{COO})_8(\text{DMF})\text{H}_3]^{3+}$                         | 3657.6          | 1219.2         |
| 1227.4       | $[(\text{CO}_3^{2-})@Ag_{20}(\text{S}'\text{Bu})_{10}(\text{CH}_3\text{COO})_8(\text{DMF})_2\text{H}_2\text{Na}_1]^{3+}$            | 3679.6          | 1226.5         |
| 1243.3       | $[(\text{CO}_3^{2-})@Ag_{20}(\text{S}'\text{Bu})_{10}(\text{CH}_3\text{COO})_8(\text{DMF})_2\text{H}_3]^{3+}$                       | 3730.7          | 1243.6         |
| 1256.3       | $[(\text{CO}_3^{2-})@Ag_{20}(\text{S}'\text{Bu})_{10}(\text{CH}_3\text{COO})_8(\text{DMF})_2\text{H}_2\text{K}_1]^{3+}$             | 3768.8          | 1256.3         |
| 1270.4       | $[(\text{CO}_3^{2-})@Ag_{20}(\text{S}'\text{Bu})_{10}(\text{CH}_3\text{COO})_8(\text{DMF})_2\text{Na}_2\text{K}_1]^{3+}$            | 3812.8          | 1270.9         |
| 1285.4       | $[(\text{CO}_3^{2-})@Ag_{20}(\text{S}'\text{Bu})_{10}(\text{CH}_3\text{COO})_8(\text{DMF})_2\text{H}_2\text{Cs}_1]^{3+}$            | 3862.6          | 1287.5         |
| 1294.3       | $[(\text{CO}_3^{2-})@Ag_{20}(\text{S}'\text{Bu})_{10}(\text{CH}_3\text{COO})_8(\text{DMF})_2\text{H}_1\text{Na}_1\text{Cs}_1]^{3+}$ | 3884.6          | 1294.9         |
| 1307.9       | $[(\text{CO}_3^{2-})@Ag_{20}(\text{S}'\text{Bu})_{10}(\text{CH}_3\text{COO})_8(\text{DMF})_2\text{Na}_1\text{K}_1\text{Cs}_1]^{3+}$ | 3922.7          | 1307.6         |
| 1331.2       | $[(\text{CO}_3^{2-})@Ag_{20}(\text{S}'\text{Bu})_{10}(\text{CH}_3\text{COO})_8(\text{DMF})_2\text{H}_1\text{Cs}_2]^{3+}$            | 3994.5          | 1331.5         |
| 1344.4       | $[(\text{CO}_3^{2-})@Ag_{20}(\text{S}'\text{Bu})_{10}(\text{CH}_3\text{COO})_8(\text{DMF})_2\text{K}_1\text{Cs}_2]^{3+}$            | 4032.6          | 1344.2         |
| 1802.2       | $[(\text{CO}_3^{2-})@Ag_{20}(\text{S}'\text{Bu})_{10}(\text{CH}_3\text{COO})_8\text{H}_1\text{Na}_1]^{2+}$                          | 3605.5          | 1802.8         |
| 1810.2       | $[(\text{CO}_3^{2-})@Ag_{20}(\text{S}'\text{Bu})_{10}(\text{CH}_3\text{COO})_8\text{H}_1\text{K}_1]^{2+}$                           | 3621.6          | 1810.8         |
| 1827.2       | $[(\text{CO}_3^{2-})@Ag_{20}(\text{S}'\text{Bu})_{10}(\text{CH}_3\text{COO})_8(\text{DMF})\text{H}_2]^{2+}$                         | 3656.6          | 1828.3         |
| 1847.2       | $[(\text{CO}_3^{2-})@Ag_{20}(\text{S}'\text{Bu})_{10}(\text{CH}_3\text{COO})_8(\text{DMF})\text{H}_1\text{K}_1]^{2+}$               | 3694.7          | 1847.4         |
| 1864.2       | $[(\text{CO}_3^{2-})@Ag_{20}(\text{S}'\text{Bu})_{10}(\text{CH}_3\text{COO})_8(\text{DMF})_2\text{H}_2]^{2+}$                       | 3729.7          | 1864.9         |
| 1883.3       | $[(\text{CO}_3^{2-})@Ag_{20}(\text{S}'\text{Bu})_{10}(\text{CH}_3\text{COO})_8(\text{DMF})_2\text{H}_1\text{K}_1]^{2+}$             | 3767.8          | 1883.9         |
| 1894.2       | $[(\text{CO}_3^{2-})@Ag_{20}(\text{S}'\text{Bu})_{10}(\text{CH}_3\text{COO})_8(\text{DMF})_2\text{Na}_1\text{K}_1]^{2+}$            | 3789.8          | 1894.9         |
| 1913.1       | $[(\text{CO}_3^{2-})@Ag_{20}(\text{S}'\text{Bu})_{10}(\text{CH}_3\text{COO})_8(\text{DMF})\text{K}_1\text{Cs}_1]^{2+}$              | 3826.6          | 1913.3         |
| 1930.1       | $[(\text{CO}_3^{2-})@Ag_{20}(\text{S}'\text{Bu})_{10}(\text{CH}_3\text{COO})_8(\text{DMF})_2\text{H}_1\text{Cs}_1]^{2+}$            | 3861.6          | 1930.8         |
| 1941.6       | $[(\text{CO}_3^{2-})@Ag_{20}(\text{S}'\text{Bu})_{10}(\text{CH}_3\text{COO})_8(\text{DMF})_2\text{Na}_1\text{Cs}_1]^{2+}$           | 3883.6          | 1941.8         |
| 1960.1       | $[(\text{CO}_3^{2-})@Ag_{20}(\text{S}'\text{Bu})_{10}(\text{CH}_3\text{COO})_8(\text{DMF})\text{Cs}_2]^{2+}$                        | 3920.4          | 1960.2         |
| 1996.1       | $[(\text{CO}_3^{2-})@Ag_{20}(\text{S}'\text{Bu})_{10}(\text{CH}_3\text{COO})_8(\text{DMF})_2\text{Cs}_2]^{2+}$                      | 3993.5          | 1996.8         |

5

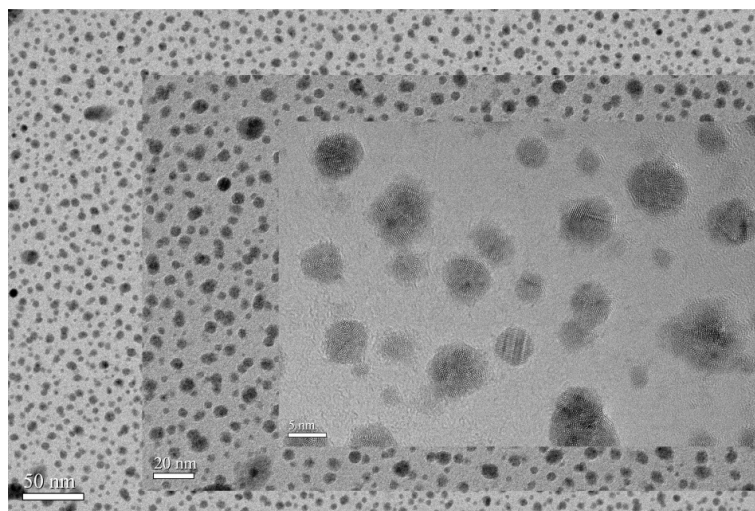

Fig. S7 TEM images of 1.

**Preparation of compound 1 and AgS'Bu bulk-modified CPEs:** The compound 1 bulk-modified CPE (1-CPE) was fabricated by mixing 0.10 g graphite powder and 0.010 g compound 1 in an agate mortar for approximately 30 min to achieve an uniform mixture; then a drop of paraffin oil was added and stirred with a glass rod.<sup>4</sup> The homogenized mixture was packed into a 3 mm inner diameter glass tube and the tube surface was wiped with 5 weighing paper. The electrical contact was established with the copper wire through the back of the electrode. In a similar manner, AgS'Bu bulk-modified CPE was prepared by similar process without compound 1.

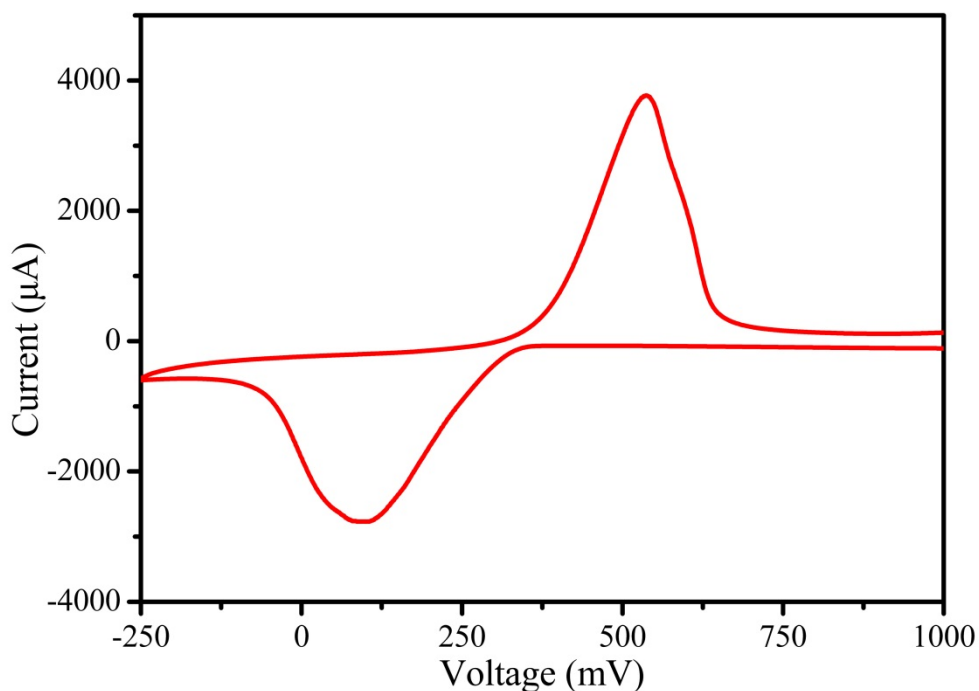

Fig. S8 Cyclic voltammogram of AgS'Bu ligand.

10

15

#### Reference:

- 1 G. Li, Z. Lei and Q.-M. Wang, *J. Am. Chem. Soc.*, 2010, **132**, 17678.
- 20 2 K. Nomiya, T. Takahashi, T. Shirai and M. Miwa, *Polyhedron*, 1987, **6**, 213.
- 3 (a) G. M. Sheldrick, *SHELX-97, Program for Crystal Structure Refinement*, University of Göttingen, Germany, 1997; (b) G. M. Sheldrick, *SHELXL-97, Program for Crystal Structure Solution*, University of Göttingen, Germany, 1997.
- 4 X.-L. Wang, Z.-H. Kang, E.-B. Wang and C.-W. Hu, *Mater. Lett.*, 2002, **56**, 393.
